# Supplementary material for: Comparison of the Virome of Quarantined Sugarcane Varieties and the Virome of Grasses Growing near the Quarantine Station
Source: MDPI journal article supplement (doi:10.3390/v13050922), 2021-05-16
Supplement: s1 [file s1]

**Supplementary Table S1.** Primer pairs used for amplification of the partial genome sequence of the umbra-like sequence isolated from sugarcane variety BJ790038.

| <b>Forward primer name</b> | <b>Forward primer sequence (5'-3')</b> | <b>Reverse primer name</b> | <b>Reverse primer sequence (5'-3')</b> | <b>Elongation time (EXT)</b> | <b>Amplicon size</b> |
|----------------------------|----------------------------------------|----------------------------|----------------------------------------|------------------------------|----------------------|
| SCUMBRA1F                  | GGACGAGATCGCTGAAACTG                   | SCUMBRA2R                  | CAGGTTTGGTCGTCGTTAG                    | 30 sec                       | 262 nt               |
| SCUMBRA1F                  | GGACGAGATCGCTGAAACTG                   | SCUMBRA3R                  | GTTCGTATCGTGTCGCC                      | 30 sec                       | 453 nt               |
| SCUMBRA2F                  | CTAACGACGACCAAAACCTG                   | SCUMBRA3R                  | GTTCGTATCGTGTCGCC                      | 30 sec                       | 209 nt               |
| SCUMBRA4F                  | CTGTTCTGACTGCGACTGG                    | SCUMBRA5R                  | CTCGGGAGTGACTGTTTGC                    | 30 sec                       | 292 nt               |
| SCUMBRA4F                  | CTGTTCTGACTGCGACTGG                    | SCUMBRA6R                  | CGAGAACGAACCACTCTGC                    | 30 sec                       | 458 nt               |
| SCUMBRA5F                  | GCAAACAGTCACTCCCGAG                    | SCUMBRA6R                  | CGAGAACGAACCACTCTGC                    | 30 sec                       | 184 nt               |
| SCUMBRA2F                  | CTAACGACGACCAAAACCTG                   | SCUMBRA4R                  | CCAGTCGCAGTCAGAACAG                    | 60 sec                       | 978 nt               |
| SCUMBRA3F                  | GGCGGACACGATACGAAC                     | SCUMBRA4R                  | CCAGTCGCAGTCAGAACAG                    | 60 sec                       | 786 nt               |
| SCUMBRA3F                  | GGCGGACACGATACGAAC                     | SCUMBRA5R                  | CTCGGGAGTGACTGTTTGC                    | 60 sec                       | 1060 nt              |

**Supplementary Table S2.** Wild *Poaceae* sample collected from grassland (GL) and sugarcane samples from the quarantine glasshouse infected by *Closteroviridae* viruses.

| Contig number_Plant species_Sample name <sup>a</sup> | Sample origin | Virus genus   | Sequence length (bp) | Best BLASTn hit (NCBI) | Gene              |
|------------------------------------------------------|---------------|---------------|----------------------|------------------------|-------------------|
| Contig1_ <i>Brachypodium_phoeconides</i> _3-BP-4     | GL, France    | Closterovirus | 535                  | YP_874184              | Polyprotein ORF1A |
| Contig2_ <i>Saccharum_spp._var._Q112</i>             | Australia     | Ampelovirus   | 1236                 | MN116751               | polyprotein ORF1A |
| Contig3_ <i>Saccharum_spp._var._B46364-USA_51/1</i>  | Barbados      | Ampelovirus   | 2687                 | MN116751               | polyprotein ORF1A |
| Contig4_ <i>Saccharum_spp._var._B46364-PAK155</i>    | Barbados      | Ampelovirus   | 833                  | MN116751               | polyprotein ORF1A |
| Contig5_ <i>Saccharum_spp._var._BJ790038</i>         | Barbados      | Ampelovirus   | 3309                 | MN116751               | polyprotein ORF1A |
| Contig6_ <i>Saccharum_spp._var._X</i>                | Egypt         | Ampelovirus   | 936                  | MN116751               | Polyprotein ORF1A |
| Contig7_ <i>Saccharum_spp._var._LF653661</i>         | Fiji          | Ampelovirus   | 1012                 | MN116751               | polyprotein ORF1A |
| Contig8_ <i>Saccharum_spp._var._NA021668</i>         | Argentina     | Ampelovirus   | 249                  | MN116751               | P6_ORF2           |

<sup>a</sup>Only contigs from sugarcane samples that are in the same genomic region than the contig from *Brachypodium phoeconides* samples are mentioned in the table.

**Supplementary Table S3.** Wild *Poaceae* samples collected from the sloped land (SL) and the grassland (GL) and sugarcane samples from the quarantine glasshouse infected by *Luteoviridae* viruses.

| Contig number_Plant species_Sample name              | Sample origin | Virus genus  | Sequence length (bp) | Best BLASTn hit (NCBI) | Gene            |
|------------------------------------------------------|---------------|--------------|----------------------|------------------------|-----------------|
| Contig9_ <i>Aegilops triuncialis</i> _2-AT-2         | SL, France    | Unclassified | 723                  | MK440658               | RdRp            |
| Contig10_ <i>Bothriochloa barbinodis</i> _3-BB-2     | GL, France    | Unclassified | 637                  | MK440658               | RdRp            |
| Contig11_ <i>Saccharum</i> spp._var._B46364-PAK155   | Barbados      | Polerovirus  | 5763                 | KY052166               | complete genome |
| Contig12_ <i>Saccharum</i> spp._var._B46364-USA_51/1 | Barbados      | Polerovirus  | 5763                 | KY052166               | complete genome |

**Supplementary Table S4.** Wild *Poaceae* samples collected from the sloped land (SL), the grassland (GL) and sugarcane samples from the quarantine glasshouse infected by *Potyviridae* viruses.

| Contig number_Plant species_Sample name              | Sample origin  | Virus genus  | Sequence length (bp) | Best BLASTn hit (NCBI) | Gene          |
|------------------------------------------------------|----------------|--------------|----------------------|------------------------|---------------|
| Contig13_ <i>Brachypodium_phoenicoides</i> _2-BP-2   | SL, France     | Tritimovirus | 9040                 | AIE45540               | entire genome |
| Contig14_ <i>Gastridium_ventricosum</i> _3-GV-3      | GL, France     | Tritimovirus | 9131                 | NP_932608              | entire genome |
| Contig15_ <i>Saccharum</i> spp. var. _B46364-USA51/1 | Barbados       | Potyvirus    | 9646                 | NC_004035              | entire genome |
| Contig16_ <i>Saccharum</i> spp. _var. _B46364-PAK155 | Barbados       | Potyvirus    | 9325                 | NC_003398              | entire genome |
| Contig17_ <i>Saccharum</i> var. _T9                  | China (Guanxi) | Potyvirus    | 9792                 | NC_004035              | entire genome |

**Supplementary Table S5.** Wild *Poaceae* samples collected from the flat stone land (FSL) and sugarcane samples from the quarantine glasshouse infected by mastreviruses (*Geminiviridae* family).

| Contig number_Plant species Sample name        | Sample origin | Virus genus | Sequence length (bp) | Best BLASTn hit (NCBI) | Gene           |
|------------------------------------------------|---------------|-------------|----------------------|------------------------|----------------|
| Contig18_ <i>Anisantha_madritensis</i> _1-BM-1 | FSL, France   | Mastrevirus | 3554                 | MK546381               | entire genome  |
| Contig19_ <i>Anisantha_madritensis</i> _1-BM-2 | FSL, France   | Mastrevirus | 3683                 | MK546381               | entire genome  |
| Contig20_ <i>Saccharum_spp.</i> _var._KN88260  | Sudan         | Mastrevirus | 2007                 | MK606500               | <i>cp, rep</i> |
| Contig21_ <i>Saccharum_spp.</i> _var._R579     | Réunion       | Mastrevirus | 3448                 | MK606500               | entire genome  |
| Contig22_ <i>Saccharum_spp.</i> _var._KN88104  | Sudan         | Mastrevirus | 958                  | MK606500               | <i>cp</i>      |
| Contig23_ <i>Saccharum_spp.</i> _var._KN88147  | Sudan         | Mastrevirus | 3422                 | MK606500               | entire genome  |
| Contig24_ <i>Saccharum_spp.</i> _var._KN8924   | Sudan         | Mastrevirus | 2838                 | MK606500               | entire genome  |
| Contig25_ <i>Saccharum_spp.</i> _var._KN8843   | Sudan         | Mastrevirus | 1277                 | MK606500               | <i>cp, rep</i> |
| Contig26_ <i>Saccharum_spp.</i> _var._X        | Egypt         | Mastrevirus | 2946                 | MK606500               | entire genome  |
| Contig27_ <i>Saccharum_spp.</i> _var._USDA     | Egypt         | Mastrevirus | 3247                 | AF037752               | entire genome  |
| Contig28_ <i>Saccharum_spp.</i> _var._USDA     | Egypt         | Mastrevirus | 3208                 | MK606500               | entire genome  |

**Supplementary Table S6.** Selected contig sequences of Wild *Poaceae* samples collected from the grassland (GL) and sugarcane samples from the quarantine glasshouse potentially infected by badnaviruses (*Caulimoviridae* family).

| Contig number_Plant species_Sample name             | Sample origin  | Virus genus | Sequence length (bp) | Best BLASTn hit (NCBI) | Gene          |
|-----------------------------------------------------|----------------|-------------|----------------------|------------------------|---------------|
| Contig29_ <i>Brachypodium phoenicoides</i> _3-BP-5  | GL, France     | Badnavirus  | 223                  | KX255726               | polyprotein   |
| Contig30_ <i>Brachypodiu phoenicoides</i> _3-BP-5   | GL, France     | Badnavirus  | 228                  | KX255726               | polyprotein   |
| Contig31_ <i>Saccharum</i> spp._var._R579           | Réunion Island | Badnavirus  | 3110                 | NC_038382              | polyprotein   |
| Contig32_ <i>Saccharum</i> spp._var._KN88104        | Sudan          | Badnavirus  | 726                  | HQ593111               | polyprotein   |
| Contig33_ <i>Saccharum</i> spp._var._Q112           | Australia      | Badnavirus  | 1159                 | JN377534               | polyprotein   |
| Contig34_ <i>Saccharum</i> spp._var._B46364-USA51/1 | Barbados       | Badnavirus  | 2935                 | NC_038382              | polyprotein   |
| Contig35_ <i>Saccharum</i> spp._var._B46364-PAK155  | Barbados       | Badnavirus  | 6534                 | NC_038382              | polyprotein   |
| Contig36_ <i>Saccharum</i> spp._var._BJ790038       | Barbados       | Badnavirus  | 7413                 | NC_038382              | entire genome |
| Contig37_ <i>Saccharum</i> spp._var._KN8843         | Sudan          | Badnavirus  | 870                  | HQ593111               | polyprotein   |
| Contig38_ <i>Saccharum</i> spp._var._X              | Egypt          | Badnavirus  | 7555                 | FJ439817               | entire genome |
| Contig39_ <i>Saccharum</i> spp._var._LF653661       | Fiji           | Badnavirus  | 469                  | HQ593111               | polyprotein   |

**Supplementary Table S7.** Wild *Poaceae* samples collected from the sloped land (SL), the grassland (GL) and from sugarcane samples located in the quarantine glasshouse, containing *Umbravirus* or umbra-like virus contigs. Contigs in bold were used for phylogenetic analyses.

| Contig number_Plant species_Sample name            | Sample origin | Virus genus       | Sequence length (bp) | Best BLASTn hit (NCBI) | Gene                |
|----------------------------------------------------|---------------|-------------------|----------------------|------------------------|---------------------|
| Contig40_ <i>Trachynia_distachya</i> _2-BD-3       | SL, France    | <i>Umbravirus</i> | <b>2457</b>          | MN868593               | RdRp + partial ORF3 |
| Contig41_ <i>Phalaris_minor</i> _2-P-5             | SL, France    | <i>Umbravirus</i> | <b>414</b>           | MK211274               | RdRp                |
| Contig42_ <i>Phalaris_minor</i> _2-P-3             | SL, France    | <i>Umbravirus</i> | <b>654</b>           | MK211274               | RdRp                |
| Contig43_ <i>Festuca</i> _sp._3-F-5                | GL, France    | <i>Umbravirus</i> | <b>1658</b>          | MK211274               | RdRp                |
| Contig44_ <i>Festuca</i> _sp._3-F-6                | GL, France    | <i>Umbravirus</i> | <b>496</b>           | MH922775               | RdRp                |
| Contig45_ <i>Bothriochloa_barbinodis</i> _3-BB-1   | GL, France    | <i>Umbravirus</i> | 347                  | MF415880               | RdRp                |
| Contig46_ <i>Brachypodium_phoenicoides</i> _3-BP-4 | GL, France    | <i>Umbravirus</i> | <b>619</b>           | MK211274               | RdRp                |
| Contig47_ <i>Saccharum</i> _spp._var._BJ790038     | Barbados      | <i>Umbravirus</i> | <b>1931</b>          | MF415880               | RdRp                |
| Contig48_ <i>Saccharum</i> _spp._var._KN8924       | Sudan         | <i>Umbravirus</i> | <b>2041</b>          | MF415880               | RdRp                |
